# Supplementary material for: Transcriptome Analysis Reveals the Potential Role of Long Non-coding RNAs in Mammary Gland of Yak During Lactation and Dry Period
Source: Front Cell Dev Biol. 2020 Nov 25;8:579708. doi: 10.3389/fcell.2020.579708 (PMC7723986; doi:10.3389/fcell.2020.579708)
Supplement: Supplementary file 5 [file Table_3.XLSX]

## Sheet: Sheet1
Supplementary Table S3 The results of differentially expressed mRNAs
transcript_id	gene_id	gene_name	LP_FPKM	DP_FPKM	log2(foldchange)	P value
XM_005886641.2	102270515	NUP98	5.3e-05	0.147595	-11.4443	0.0465675
XM_005886689.2	102284921	CTSB	6.63e-06	0.382523	-15.817	0.0125846
XM_005886707.1	102268287	RPL17	7.61813	2.2753	1.74338	0.0217788
XM_005886755.2	102284082	ZNF205	1.01109	0.143796	2.81382	0.02808
XM_005886870.1	102276310	TPSB2	25.1511	7.49475	1.74667	0.00941248
XM_005886920.1	102270623	MON2	3.5675	1.54732	1.20514	0.00202377
XM_005886928.2	102272495	ANGPT2	0.260613	0.000111109	11.1957	0.00992993
XM_005886999.2	102279966	LOC102279966	232.594	113.502	1.0351	0.00326416
XM_005887050.2	102274413	ENTPD2	18.7413	39.655	-1.08128	0.000212267
XM_005887052.2	102274981	PTGDS	15.4089	38.613	-1.32532	0.00109449
XM_005887145.2	102278476	HOMER2	16.6899	41.5432	-1.31564	0.000769188
XM_005887161.1	102283989	PDGFRL	19.3367	9.04437	1.09625	0.0116596
XM_005887164.2	102284547	FGL1	179.186	68.4229	1.38891	0.000879972
XM_005887187.2	102267346	USP47	0.0672131	1.48e-05	12.1499	0.0386183
XM_005887208.2	102274614	PGRMC1	0.200921	7.92e-06	14.6313	0.00494308
XM_005887254.1	102266694	LOC102266694	0.164187	0.880433	-2.42287	0.0128064
XM_005887263.1	102269123	ALDH3A1	0.438756	1.89531	-2.11094	0.0386558
XM_005887301.2	102280056	DKK2	7.62463	2.60909	1.54712	0.000643227
XM_005887361.1	102273550	WDR44	2.8e-05	0.119446	-12.0587	0.033534
XM_005887372.2	102276955	LOC102276955	5.66572	1.0722	2.40169	0.0017863
XM_005887459.1	102280821	PVALB	2.05562	0.225249	3.18998	0.014787
XM_005887624.1	102283814	CLCN5	1.57e-07	0.236532	-20.5201	0.0194339
XM_005887625.1	102283814	CLCN5	0.164437	9.05e-07	17.4714	0.00134431
XM_005887649.2	102265649	CCDC120	0.0017524	0.24028	-7.09924	0.034776
XM_005887773.2	102280342	TBCD	0.104615	3.8e-05	11.4268	0.0213899
XM_005887791.2	102287856	LOC102287856	1.86789	1552.69	-9.69914	1.55e-68
XM_005887855.1	102283636	DMRTA1	10.3461	4.39504	1.23514	0.00687177
XM_005887958.2	102266329	SDCBP2	1.04717	5.81496	-2.47327	0.00361642
XM_005888187.2	102267457	SPAG5	0.395464	1.46945	-1.89366	0.0117118
XM_005888235.2	102279605	INPP5K	0.449498	9.49e-05	12.2094	0.00222543
XM_005888305.1	102280537	NOS1	1.39416	3.76968	-1.43505	0.00972834
XM_005888338.2	102265946	SLC39A3	8.17646	4.04386	1.01574	0.0438009
XM_005888531.2	102281859	KCNT1	4.82812	10.1994	-1.07895	0.00286035
XM_005888538.2	102283539	RPS6KC1	0.1552	6.56e-05	11.2071	0.00718053
XM_005888563.2	102265765	NEK2	0.526884	1.68747	-1.6793	0.0427622
XM_005888566.1	102266619	KCNH1	0.242475	0.000129409	10.8717	0.00524436
XM_005888594.2	102277362	TSPAN6	0.367051	2.26e-05	13.9898	0.0392218
XM_005888621.2	102285582	EEF1D	0.0140014	3.32274	-7.89066	5.86e-05
XM_005888625.1	102286911	GSDMD	1.63e-06	0.184633	-16.7908	0.0237399
XM_005888937.1	102274816	BUB1B	0.769792	2.44187	-1.66545	0.00583452
XM_005889047.2	102286535	PDE4D	1.80748	0.691638	1.38589	0.0382379
XM_005889096.2	102281491	ELMO1	4.15e-10	0.113273	-28.0252	0.0141963
XM_005889132.1	102268305	CCDC129	2.19145	0.57532	1.92945	0.0195051
XM_005889162.2	102277735	CHCHD7	3.9325	11.4678	-1.54407	0.00246831
XM_005889231.2	102275094	LOC102275094	4.66e-05	0.546514	-13.5165	0.0444446
XM_005889240.1	102276884	DTNA	0.000929178	0.339482	-8.51316	0.0154483
XM_005889294.2	102269511	RNGTT	0.0595627	5.77e-05	10.0109	0.0431809
XM_005889308.1	102274060	GRIA3	2.69224	0.0460254	5.87023	0.000245124
XM_005889317.1	102276527	TENM1	1.78e-13	0.0634657	-38.3783	0.0117921
XM_005889333.2	102281669	TNPO1	0.814569	0.177941	2.19464	0.0364222
XM_005889358.2	102264536	CCNB1	0.981737	3.24091	-1.72299	0.0319695
XM_005889436.2	102269043	DDX3X	0.627452	0.000212936	11.5249	0.000115592
XM_005889461.1	102279418	EFEMP1	144.226	71.0514	1.0214	0.00528553
XM_005889543.1	102279616	GULP1	3.15993	0.40902	2.94965	0.0347237
XM_005889572.1	102266909	RIMBP2	0.777593	2.47405	-1.66979	0.00583981
XM_005889581.2	102269416	GPM6B	3.32768	1.15456	1.52717	0.0109837
XM_005889642.1	102269794	CXCR1	0.172629	5.68e-07	18.2134	0.0153347
XM_005889652.2	102272630	VIL1	0.181108	0.000433165	8.70772	0.0162072
XM_005889658.2	102274064	LOC102274064	0.345023	7.22e-08	22.1884	0.0213612
XM_005889678.2	102279239	ATG9A	0.000162282	0.616067	-11.8904	0.0151362
XM_005889727.2	102270350	CCT4	0.129883	1.72e-05	12.8808	0.0213808
XM_005889801.2	102271872	PAM	8.58343	4.21391	1.02639	0.00524508
XM_005889904.2	102283647	RNF111	0.970221	2.63117	-1.43932	0.0488642
XM_005889909.1	102284855	CCNB2	0.604524	2.3401	-1.9527	0.0315546
XM_005889983.1	102280643	POLR1B	0.0945964	0.00028533	8.37301	0.0205583
XM_005890008.1	102265775	RAI2	0.202015	8.57e-05	11.2024	0.0299811
XM_005890038.2	102278296	BCL2L14	3.99909	8.07852	-1.01442	0.0287558
XM_005890114.2	102278207	FABP7	15.4625	4.18871	1.8842	0.000326762
XM_005890148.2	102287590	AGFG1	0.229945	8.91e-05	11.3342	0.00982963
XM_005890181.1	102273972	ITGB1	0.137293	1.14e-05	13.5545	0.014543
XM_005890238.1	102266632	LOC102266632	1.84522	4.85412	-1.39542	0.0126197
XM_005890325.2	102265105	COL1A1	79.8458	187.624	-1.23256	0.00249677
XM_005890357.2	102273008	CALCOCO2	0.561407	0.000459934	10.2534	0.00237208
XM_005890416.2	102266916	VDAC1	0.00114766	5.42757	-12.2074	1.84e-14
XM_005890630.2	102265859	KIF11	0.546587	1.75485	-1.68282	0.0197304
XM_005890701.2	102268402	ZEB2	9.31848	4.01333	1.21529	0.000762073
XM_005890706.2	102270836	C3	199.037	416.174	-1.06415	0.00630153
XM_005890719.2	102273781	MARCHF2	0.421272	1.34e-05	14.9403	0.0266538
XM_005890721.1	102274542	ANGPTL4	94.929	201.453	-1.08552	0.00470917
XM_005890731.1	102277268	LOC102277268	12.4559	6.0962	1.03085	0.0072602
XM_005890771.2	102264548	CCDC151	0.164387	0.000827422	7.63426	0.0371546
XM_005890837.1	102285697	KLHL20	9.31e-05	0.247531	-11.3762	0.0154606
XM_005890878.1	102277559	TCP11L1	3.11073	9.35617	-1.58866	0.00270275
XM_005890900.2	102282706	CD44	15.84	33.6589	-1.08742	0.0018523
XM_005890904.1	102283746	SLC1A2	3.5619	11.1811	-1.65034	0.00260224
XM_005891021.1	102280556	PRPS2	1.61e-06	0.198153	-16.9086	0.0408124
XM_005891053.2	102269708	MCM8	0.126346	2e-05	12.6228	0.00252615
XM_005891098.2	102285600	GNB2L1	120.168	54.8116	1.1325	0.0151625
XM_005891153.2	102282528	F13A1	28.4172	13.4971	1.07411	0.00849977
XM_005891235.1	102286839	KANK4	2.81255	1.33467	1.0754	0.0309094
XM_005891322.2	102264554	KIAA1324	2.75e-05	0.308105	-13.4543	0.0437464
XM_005891358.1	102277377	RIC1	0.241031	8.93e-05	11.3986	0.00109398
XM_005891397.2	102264458	DAXX	0.00083584	0.464514	-9.11828	0.0391218
XM_005891553.2	102264738	TFB1M	0.000149716	1.00576	-12.7138	2.09e-05
XM_005891567.1	102269066	TDRD3	4.34e-05	0.899586	-14.3408	0.00393189
XM_005891599.1	102281037	KCNIP3	0.614736	0.0683974	3.16795	0.0451527
XM_005891626.2	102287974	LOC102287974	0.0488085	0.453204	-3.21496	0.0400769
XM_005891641.2	102268232	C4BPA	0.219833	2.4947	-3.50439	0.00462117
XM_005891642.2	102268232	C4BPA	2.85647	17.2666	-2.59568	1.79e-08
XM_005891708.2	102286737	KIF20A	0.439429	1.68592	-1.93983	0.0109062
XM_005891782.1	102286738	ETFA	1.22e-05	1.06291	-16.4126	0.00343788
XM_005891807.2	102269533	KIAA0391	0.925729	0.000120371	12.9089	0.00161005
XM_005891852.1	102284213	PRMT3	0.597662	0.0214487	4.80037	0.0204525
XM_005891865.2	102264555	IGFBP1	35.1237	1.66709	4.39704	3.21e-28
XM_005891967.2	102273878	FBXO32	2.31e-05	0.252753	-13.4162	6.88e-05
XM_005892016.2	102266927	SMARCD1	0.101227	3.05e-06	15.0207	0.0384873
XM_005892028.2	102270564	LOC102270564	15.2545	5.65772	1.43094	0.000540735
XM_005892052.1	102279437	ELAVL2	0.344254	0.0568425	2.59843	0.0135806
XM_005892074.2	102286848	RERGL	4.4298	1.42038	1.64096	0.0357658
XM_005892084.2	102266548	SYT4	0.0282307	8.63718	-8.25715	0.0109577
XM_005892090.2	102268408	AMT	5.81e-05	0.345028	-12.5365	0.0294647
XM_005892097.2	102270175	IP6K1	0.000193066	1.0566	-12.418	0.0135537
XM_005892113.2	102274363	SLC38A3	1.13995	2.89474	-1.34446	0.0274356
XM_005892208.1	102278316	LOC102278316	14.3658	86.9466	-2.59749	0.000692655
XM_005892219.2	102282158	LOC102282158	0.99385	4.22825	-2.08896	0.0243457
XM_005892236.2	102267395	LIPT1	0.233904	3.76e-05	12.6014	0.0438887
XM_005892303.1	102288073	BCAS3	1.24e-05	0.809063	-15.9979	3.27e-06
XM_005892306.1	102288073	BCAS3	2.47459	0.763944	1.69565	0.0303078
XM_005892326.2	102271891	IL1R2	0.536255	1.71768	-1.67947	0.0454961
XM_005892330.2	102272648	PPFIA2	0.14647	0.000200352	9.51385	0.00183946
XM_005892387.2	102265587	FANCA	1.7837	3.96777	-1.15346	0.00735128
XM_005892472.1	102267287	ARHGAP11A	0.277369	1.37641	-2.31103	0.0088726
XM_005892486.1	102272075	LOC102272075	6.66591	39.1727	-2.55497	4.84e-07
XM_005892509.2	102277667	PEX5L	0.251732	8.79e-06	14.8054	0.00572876
XM_005892515.2	102277667	PEX5L	0.24208	3.83e-12	35.8803	0.00015307
XM_005892561.2	102268527	CLCN3	2.52059	5.57708	-1.14575	0.0336132
XM_005892640.2	102272551	NCDN	0.538109	2.15784	-2.00362	0.0183001
XM_005892647.1	102274366	AGO3	2.83e-06	0.149575	-15.6891	0.0106574
XM_005892661.2	102278047	KCNAB2	5.49e-12	0.223014	-35.2421	0.0129322
XM_005892702.2	102266649	LOC102266649	2.83549	6.93442	-1.29018	0.0136643
XM_005892837.1	102285330	TRIM50	6.87e-06	0.551743	-16.2934	0.0203355
XM_005892902.2	102281977	PSMD6	6.93e-05	0.473964	-12.7402	0.0393738
XM_005892972.1	102283093	EPHA3	1.78299	0.57006	1.64511	0.0064767
XM_005892973.1	102283093	EPHA3	0.96171	0.0350331	4.77881	0.000458591
XM_005892983.1	102286273	VPS13A	9.25e-09	0.313687	-25.015	0.0114423
XM_005892984.2	102286273	VPS13A	0.00136861	0.59242	-8.75777	0.00686189
XM_005893009.2	102269538	SLC30A6	0.0624296	3.18e-06	14.2613	0.0442447
XM_005893076.2	102267011	LOC102267011	117.635	1.87841	5.96866	5.8e-09
XM_005893092.2	102270667	RGL1	0.35858	0.0888791	2.01238	0.0406006
XM_005893137.2	102285241	AZGP1	191.049	450.469	-1.23749	0.000496506
XM_005893149.2	102264566	MEPCE	0.129169	4.44e-06	14.8275	0.00613121
XM_005893150.1	102264566	MEPCE	0.000305643	0.668347	-11.0945	0.0446209
XM_005893192.1	102277870	DRD5	0.0818387	0.500355	-2.6121	0.036327
XM_005893196.2	102278706	LYAR	0.231897	0.000115734	10.9685	0.033131
XM_005893248.2	102269254	CDCA8	0.252252	1.64986	-2.70941	0.0150557
XM_005893318.1	102266441	AKAP2	0.171821	2.61328	-3.92688	0.0348859
XM_005893399.1	102267012	MBNL3	0.134505	1.23867	-3.20306	0.0425335
XM_005893433.2	102278147	CANX	1.76e-05	0.194867	-13.4319	0.0190064
XM_005893461.2	102287033	TYW3	18.2583	8.34074	1.13031	0.00681598
XM_005893526.1	102281981	PLEKHB1	0.172685	0.00326127	5.72657	0.0276625
XM_005893532.2	102283096	RAB6A	9.06e-09	2.60887	-28.1007	2.3e-10
XM_005893537.2	102284689	UCP2	8.49437	21.5392	-1.34239	0.000481007
XM_005893605.1	102280392	CAPN14	0.359814	2.79508	-2.95757	0.000355332
XM_005893640.2	102267291	DCLK1	0.125449	5.45e-05	11.1698	0.00311298
XM_005893644.1	102268330	TGIF1	1.63e-06	0.441508	-18.0447	0.0352394
XM_005893652.2	102270577	NDC80	0.324702	1.42295	-2.1317	0.0152007
XM_005893714.2	102268415	LOC102268415	13.3358	32.4021	-1.28078	0.00790254
XM_005893772.1	102264471	SLC8A1	0.199116	1.13493	-2.51092	0.015182
XM_005893796.2	102275509	LAMA1	0.755252	0.147291	2.35829	0.00511739
XM_005893805.2	102278224	ENTPD5	0.564091	0.0769059	2.87476	0.0461956
XM_005893899.1	102283378	SYMPK	1.1042	5.38876	-2.28695	3.76e-05
XM_005893915.2	102287988	PEPD	0.165303	2.16e-05	12.9022	0.0491203
XM_005893966.2	102278225	SMOX	0.159182	2.25e-06	16.1105	0.0125545
XM_005894014.1	102270376	PLCXD1	3.8397	11.3882	-1.56847	0.00111469
XM_005894052.2	102280772	FRMD8	0.16052	2.29e-33	105.789	0.0232467
XM_005894082.2	102288373	PYGM	5.82e-08	0.222042	-21.8637	0.0281702
XM_005894175.2	102270094	COL19A1	0.698933	0.166008	2.0739	0.0320317
XM_005894178.2	102270378	ERI3	3.66523	0.756316	2.27684	0.00562843
XM_005894215.2	102280957	TSPAN1	4.78973	16.8617	-1.81573	0.000297075
XM_005894497.1	102276261	ATXN2L	0.0758582	0.667152	-3.13664	0.0217945
XM_005894499.1	102276261	ATXN2L	2.76013	9.77348	-1.82414	0.0179281
XM_005894504.2	102278227	ATP2A1	0.847912	0.19053	2.1539	0.013042
XM_005894534.2	102286949	KIAA0101	1.20266	5.78439	-2.26594	0.00641092
XM_005894621.2	102265512	OXR1	0.695936	0.0404128	4.10607	0.0076406
XM_005894682.2	102286099	FAM69A	0.405044	0.000199036	10.9908	0.000385118
XM_005894690.2	102287992	TMED5	0.232856	1.49e-05	13.9325	0.000276612
XM_005894724.2	102274182	OSBPL9	11.4052	4.6743	1.28687	0.00266403
XM_005894766.2	102285523	MXI1	3.28e-05	0.280122	-13.0596	0.0286881
XM_005894770.2	102286861	XPNPEP1	0.189813	2.25e-05	13.0454	0.0193983
XM_005894775.2	102265134	NEB	0.0847206	0.258618	-1.61004	0.0318659
XM_005894786.2	102268249	TNFSF13	0.29021	0.000302596	9.90549	0.0227289
XM_005894787.2	102268249	TNFSF13	0.330291	1.58e-07	20.9949	0.0144498
XM_005894863.2	102273612	CCL28	34.4797	89.9197	-1.38289	9.23e-06
XM_005894865.2	102274183	NIM1K	2.11412	0.571506	1.88722	0.00943213
XM_005894901.2	102284039	TARS2	0.115232	4.87e-06	14.5297	0.044044
XM_005894917.1	102288279	SETDB1	0.357641	3.08031	-3.10649	0.00451149
XM_005894957.2	102273613	POGZ	0.025713	0.53276	-4.37292	0.0284578
XM_005895189.1	102273323	ERC1	0.18938	2.02646	-3.41961	0.0128673
XM_005895205.2	102278885	ATP6V1E1	1.04904	11.1449	-3.40924	0.00133067
XM_005895207.2	102279560	BID	1.28202	8.73002	-2.76757	0.00500142
XM_005895294.2	102280964	GFRA2	1.47839	3.49324	-1.24054	0.0366545
XM_005895295.2	102280964	GFRA2	0.630232	0.0654378	3.26769	0.025596
XM_005895324.2	102288282	EGR3	0.839084	0.00252653	8.37551	0.000336635
XM_005895327.1	102264953	LOC102264953	39.3274	18.7184	1.07108	0.0497644
XM_005895345.1	102271708	SLC26A2	29.2874	63.4851	-1.11614	0.0163151
XM_005895378.1	102281531	HSD17B14	20.1128	7.4234	1.43796	0.00467747
XM_005895482.2	102267504	LOC102267504	4401.41	9486.81	-1.10796	0.00362622
XM_005895585.1	102275980	LOC102275980	553.259	179.17	1.62663	5.11e-06
XM_005895630.1	102269162	MSH6	0.13228	5.22e-20	61.1373	0.0143268
XM_005895731.2	102272660	MPV17	1.45772	4.37281	-1.58485	0.0278011
XM_005895751.2	102277484	SUPT7L	0.0322033	0.460298	-3.83729	0.04436
XM_005895787.1	102265420	IL12RB2	0.374986	0.00494872	6.24364	0.00254363
XM_005895792.2	102267224	MIER1	0.218483	1.03527	-2.24441	0.015751
XM_005895798.2	102267224	MIER1	0.256423	3.97e-05	12.6568	0.00917316
XM_005895832.2	102278711	ELF2	0.00100843	0.603102	-9.22415	0.00186183
XM_005895883.2	102271998	ARID1A	1.20989	0.0156813	6.26969	2.5e-09
XM_005895934.1	102287321	ZNF683	0.941241	3.48851	-1.88997	0.0269383
XM_005895983.2	102279741	PPP1R16B	8.44e-05	1.93203	-14.4833	1.66e-09
XM_005895990.2	102281707	LOC102281707	48.5857	145.146	-1.5789	0.00297415
XM_005896089.1	102265892	HPN	66.5213	186.756	-1.48927	0.000281392
XM_005896093.2	102266744	FXYD1	36.3726	17.454	1.05929	0.0257503
XM_005896097.2	102268617	FXYD5	4.03511	12.5908	-1.64169	0.0157538
XM_005896181.1	102273616	PJA1	4.74e-05	0.130652	-11.4295	0.0175742
XM_005896222.2	102285341	ENPEP	4.62542	1.78948	1.37004	0.00374314
XM_005896243.2	102266946	LEF1	0.386527	0.000130432	11.5331	0.00524505
XM_005896251.2	102269089	NTRK2	0.00847135	0.246715	-4.86411	0.0348189
XM_005896365.2	102287905	LALBA	162.23	39.9395	2.02215	0.0301555
XM_005896376.1	102266569	RND1	9.02547	20.8653	-1.20903	0.00376057
XM_005896393.2	102270959	LOC102270959	6.1216	14.7702	-1.27071	0.00116308
XM_005896396.2	102271809	TROAP	0.110848	0.635467	-2.51923	0.0305602
XM_005896408.1	102275324	AQP5	2.56792	7.74583	-1.59282	0.0185221
XM_005896447.2	102287715	TFEB	0.00310024	1.09654	-8.46636	2.13e-05
XM_005896466.1	102271154	IL17RB	15.7152	6.94199	1.17874	0.0127808
XM_005896490.1	102277773	ZNF821	3.54e-06	0.425904	-16.8753	0.0205455
XM_005896516.2	102284980	ZFP90	0.632222	6.45e-06	16.5802	0.00172624
XM_005896544.2	102268144	CTCF	0.224844	9.15e-07	17.9071	0.0108704
XM_005896570.2	102275618	RRAD	7.50175	50.5014	-2.75102	2.07e-07
XM_005896667.2	102285065	RHOT1	1.95e-05	0.375605	-14.2337	0.00785624
XM_005896771.1	102270476	KCNC1	0.501251	1.86106	-1.89252	0.0365462
XM_005896804.1	102280126	AK5	7.1269	2.83894	1.32792	0.00403086
XM_005896835.1	102267510	FILIP1L	0.000421936	0.486163	-10.1702	0.016118
XM_005896900.1	102286664	FGF13	2.69498	0.987963	1.44775	0.0424427
XM_005896901.1	102286664	FGF13	0.319156	0.0109959	4.85922	0.00723444
XM_005896951.2	102279745	HTR1B	0.445021	0.0638987	2.80001	0.0236401
XM_005896958.1	102281995	LCA5	4.41145	1.76598	1.32078	0.015574
XM_005896961.1	102283482	DCAF6	0.000376527	0.324243	-9.75011	0.0081636
XM_005897016.1	102277963	SORCS1	1.12e-08	0.13546	-23.5286	0.0366137
XM_005897019.1	102277963	SORCS1	2.08208	0.574669	1.85722	0.00676547
XM_005897042.2	102264960	CSN3	782.825	1655.68	-1.08066	0.013709
XM_005897056.2	102268544	SLC4A4	0.00139756	0.425553	-8.25028	0.000110665
XM_005897065.2	102272184	NCAPG	1.22438	2.71804	-1.15052	0.0446731
XM_005897076.1	102275427	PPARGC1A	0.0080105	0.171237	-4.41796	0.0107813
XM_005897077.2	102275427	PPARGC1A	9.4e-12	0.179254	-34.1513	0.021955
XM_005897105.2	102283773	TBCEL	3.25328	1.14928	1.50116	0.00253334
XM_005897193.2	102284984	DPT	72.3615	33.9449	1.09203	0.0151315
XM_005897216.2	102268705	ASPM	0.234722	1.45987	-2.63681	9.7e-06
XM_005897217.2	102268705	ASPM	0.0729865	0.000639441	6.83467	0.00579868
XM_005897345.2	102282836	KLHL5	3.07552	6.5956	-1.10067	0.0089824
XM_005897357.2	102285828	ETV1	0.21042	0.758739	-1.85033	0.0362167
XM_005897364.2	102287046	DGKB	0.121228	1.11e-05	13.4105	0.00597203
XM_005897368.2	102264394	SOSTDC1	3.19316	8.20501	-1.36152	0.0333055
XM_005897411.2	102277777	CIT	0.317747	0.765751	-1.269	0.037292
XM_005897480.2	102274669	TRPM3	0.173561	0.000123527	10.4564	0.00488597
XM_005897492.2	102274669	TRPM3	0.0721219	2.52e-27	84.5645	0.0240586
XM_005897493.1	102274669	TRPM3	0.678009	1.67286	-1.30294	0.0155171
XM_005897495.1	102274669	TRPM3	0.000145566	0.272464	-10.8702	0.0247799
XM_005897497.1	102274669	TRPM3	2.01348	0.0013429	10.5501	2.52e-21
XM_005897527.2	102264395	IDO1	7.91997	24.222	-1.61275	0.0182411
XM_005897690.2	102266749	PPP3CA	4.99e-08	0.109254	-21.0617	0.0391247
XM_005897716.2	102274194	ACTA2	0.000695206	1.13604	-10.6743	0.036109
XM_005897831.2	102284602	DLG1	0.206162	7.89e-06	14.6736	0.00366951
XM_005897957.2	102278064	LYVE1	58.4254	24.7091	1.24155	0.000151809
XM_005897958.2	102278336	MRVI1	0.51327	1.9925	-1.95679	0.0103668
XM_005898023.2	102272188	CSF3	2.42028	0.771103	1.65018	0.0414596
XM_005898226.2	102266675	CAP2	4.15e-05	0.263229	-12.6292	0.0173603
XM_005898394.2	102271535	COL6A5	10.4806	2.27384	2.20452	1.28e-05
XM_005898457.2	102268348	LOC102268348	664.662	308.884	1.10556	0.00247122
XM_005898464.2	102269918	MFAP5	126.235	60.1127	1.07037	0.000612254
XM_005898567.2	102283028	RRP15	1.29e-06	0.125642	-16.57	0.0190525
XM_005898607.1	102272009	IGF1	7e-06	0.523327	-16.1902	0.0122117
XM_005898613.1	102272009	IGF1	0.764293	2.88e-06	18.0184	0.00797106
XM_005898617.1	102275334	LOC102275334	0.0614075	0.0086448	2.82851	0.0176766
XM_005898641.2	102284891	LOC102284891	6.83867	16.3042	-1.25346	0.0220764
XM_005898647.1	102286292	HAX1	6.33e-06	0.472683	-16.1883	0.0247646
XM_005898680.2	102270779	MUC1	7.20979	15.2934	-1.08488	0.0260169
XM_005898731.2	102283400	CCT3	0.45612	6.63e-16	49.2896	0.00470759
XM_005898732.2	102283400	CCT3	0.991132	0.000142621	12.7627	0.000934415
XM_005898945.2	102276379	SPI1	3.76e-06	1.93783	-18.9759	0.000678009
XM_005898986.2	102287624	PDHB	0.618585	0.000114424	12.4004	0.00541898
XM_005898992.2	102265245	DNASE1L3	12.4894	4.74813	1.39527	0.00410494
XM_005899045.2	102281820	PPAT	0.000367736	0.53286	-10.5009	0.0138604
XM_005899113.1	102278533	MYB	0.655005	4.6e-05	13.7976	0.000227402
XM_005899142.2	102288008	WNT2	4.75125	2.08278	1.1898	0.0363213
XM_005899145.2	102265246	CXCL13	24.3014	6.25497	1.95796	0.000151284
XM_005899331.2	102277026	ABCA10	21.4352	9.74436	1.13734	0.000498928
XM_005899346.1	102281821	RGN	2.06857	0.00059398	11.7659	1.29e-07
XM_005899356.2	102284056	CDK16	0.118826	0.886313	-2.89897	0.0218966
XM_005899400.1	102274774	OGDH	1.25592	3.4878	-1.47357	0.00985988
XM_005899528.2	102267424	TAT	0.540291	0.0012396	8.76772	0.000888711
XM_005899563.2	102278447	DKC1	0.659272	0.000474844	10.4392	0.00154315
XM_005899645.2	102280877	ABCA13	0.17991	0.0311834	2.52843	0.00340473
XM_005899666.1	102288203	LOC102288203	109.061	32.3784	1.75203	2.05e-07
XM_005899714.1	102279287	SCAMP1	5.42e-09	0.498319	-26.4546	0.0435673
XM_005899747.1	102265336	GK	0.197212	0.0044219	5.47894	0.0240446
XM_005899779.1	102275722	STC2	12.5747	25.6552	-1.02873	0.0339561
XM_005899818.2	102287443	SLC39A8	4.33793	0.0498934	6.44201	6.4e-10
XM_005899819.2	102287443	SLC39A8	56.1462	148.669	-1.40484	8.74e-05
XM_005899836.1	102270310	SFRP1	37.7107	14.4427	1.38463	1.7e-05
XM_005899851.1	102275237	USP1	0.277925	0.000153346	10.8237	0.00457952
XM_005899938.1	102278729	IL1RL1	7.86607	3.5236	1.15859	0.0160268
XM_005899950.1	102281723	KLHL13	0.355807	9.66e-06	15.1685	0.000162188
XM_005899987.1	102269175	LOC102269175	0.415001	5.92985	-3.83681	0.00532416
XM_005900132.1	102264777	GLTSCR1L	0.218613	2.58629	-3.56443	0.000812613
XM_005900142.2	102267606	TAF8	0.000898831	1.16741	-10.343	0.0014773
XM_005900179.2	102280030	DNAJC18	0.113276	3.57e-05	11.6312	0.021155
XM_005900196.2	102284429	APBB3	1.01749	0.000279588	11.8294	0.000122086
XM_005900323.2	102280223	FOSB	4.89394	0.735937	2.73334	0.0127632
XM_005900396.1	102278905	SLC22A3	7.7266	30.5269	-1.98218	6e-06
XM_005900466.2	102277131	GLDN	8.39261	20.1473	-1.2634	0.00671951
XM_005900483.2	102284160	ELMOD1	0.74526	0.0441653	4.07676	0.00380985
XM_005900516.2	102270034	DHPS	0.00155911	2.16909	-10.4422	0.00176801
XM_005900617.1	102277216	WDFY4	5.20611	11.8398	-1.18537	5.6e-05
XM_005900624.1	102277976	MAPK8	7.77e-06	0.123004	-13.9506	0.00334834
XM_005900649.2	102287626	SEPT4	0.00458449	0.300874	-6.03625	0.0367096
XM_005900657.1	102265440	RAD51C	5.27425	0.391553	3.75169	0.0343488
XM_005900675.1	102272106	ZDHHC13	5.13074	2.33374	1.13652	0.0334668
XM_005900695.2	102276855	LOC102276855	20.4853	66.7201	-1.70353	0.000587178
XM_005900795.2	102281163	OSBPL6	0.0902234	0.641393	-2.82964	0.0271075
XM_005900832.1	102267881	SNX12	3.32166	7.87856	-1.24603	0.0407193
XM_005900836.2	102269287	KIF4A	0.454565	1.36779	-1.58929	0.03348
XM_005900851.2	102273920	GNAI1	0.146511	0.000371503	8.62342	0.0247165
XM_005900896.2	102265061	LTF	2484.24	5547.85	-1.15912	0.00182146
XM_005900937.2	102281640	SLC1A5	4.57403	10.8601	-1.2475	0.00465962
XM_005900989.2	102275053	FOS	202.914	76.0804	1.41527	0.000222727
XM_005901003.1	102279752	KIAA1324L	4.41203	1.22884	1.84415	0.000197281
XM_005901018.1	102283698	DRP2	0.000394283	0.144464	-8.51726	0.043522
XM_005901043.2	102267525	TTR	177.913	74.7888	1.25028	0.000114377
XM_005901048.2	102268448	TRAPPC8	4.39e-05	0.14069	-11.6458	0.0182792
XM_005901088.2	102282650	ORM1	1.02269	25.1422	-4.61967	0.000821536
XM_005901139.2	102280228	ACAA1	0.195195	1.97e-06	16.5946	0.0247548
XM_005901273.2	102271174	PTGS2	2.72197	1.3016	1.06437	0.0415234
XM_005901279.2	102272590	CENPF	0.916054	3.2003	-1.8047	1.76e-05
XM_005901292.2	102277698	LOC102277698	81.5692	206.581	-1.34061	0.000224921
XM_005901350.2	102273442	SRI	0.338812	4.02e-05	13.0411	0.0493855
XM_005901351.1	102273924	STEAP4	25.3763	56.4212	-1.15276	0.00384962
XM_005901408.2	102268450	CHN2	2.02249	0.398644	2.34296	0.031906
XM_005901484.2	102268727	HDLBP	1.39e-05	0.171159	-13.5899	0.0203259
XM_005901570.1	102271361	CACNA1E	0.197794	1.35e-07	20.4848	2.5e-05
XM_005901672.2	102279292	OS9	1.28e-06	0.183308	-17.1318	0.0498707
XM_005901673.2	102279292	OS9	5.93e-20	0.290054	-62.0845	0.0240975
XM_005901696.2	102285843	R3HDM2	0.262663	0.875224	-1.73644	0.0387616
XM_005901768.2	102281728	PLAT	0.331879	4.02e-06	16.3331	0.00725109
XM_005901799.1	102267045	ZMYND11	0.165759	0.000163451	9.98601	0.00729469
XM_005901814.2	102272022	LOC102272022	5.75709	29.3867	-2.35175	2.34e-07
XM_005901816.2	102272594	LOC102272594	4.53e-05	0.630751	-13.7651	0.000750982
XM_005901829.2	102277220	ECM2	27.7705	13.0363	1.09102	0.000187656
XM_005901834.2	102278456	OGN	21.8435	6.17358	1.82302	2.42e-07
XM_005901874.2	102266201	LOC102266201	20.734	42.5091	-1.03577	0.021016
XM_005901928.1	102266106	BMP4	0.00112431	1.18204	-10.038	0.0210742
XM_005901931.1	102266106	BMP4	0.544608	4.6e-09	26.8182	0.000186005
XM_005901940.2	102270124	CDO1	85.5486	203.48	-1.25007	0.00160682
XM_005901979.2	102282378	UCHL1	9.56419	2.1652	2.14314	0.000878825
XM_005901985.2	102283888	RBM47	0.000105314	0.313836	-11.5411	0.0338926
XM_005902007.1	102267529	INSC	2.25e-05	0.23201	-13.3333	0.0212275
XM_005902008.1	102267529	INSC	0.125618	2.08e-06	15.8806	0.0430243
XM_005902009.1	102267990	LOC102267990	0.377778	2.56255	-2.76197	0.0155541
XM_005902085.1	102270495	NFE2	0.60441	2.574	-2.09041	0.023945
XM_005902086.1	102270495	NFE2	0.388243	0.000288575	10.3938	0.00979546
XM_005902116.2	102279675	PCBP2	0.00131299	3.19541	-11.2489	0.000213439
XM_005902131.2	102283038	AAAS	4.01e-06	0.24174	-15.8791	0.0490645
XM_005902136.1	102283975	PFDN5	0.000105299	1.63399	-13.9216	0.0466454
XM_005902218.2	102286123	LOC102286123	10.3512	4.82491	1.10122	0.0316085
XM_005902280.2	102283222	CTAGE5	0.238525	5.73e-06	15.3456	0.0107216
XM_005902370.2	102268908	SH3D19	0.106596	3.51e-05	11.5688	0.021143
XM_005902402.2	102277706	MYOC	60.5071	26.2461	1.205	0.000126821
XM_005902435.1	102265447	CPA3	8.10953	1.78796	2.1813	0.0316551
XM_005902512.2	102267160	LOC102267160	6.68006	40.7609	-2.60925	0.00190127
XM_005902513.1	102267713	LOC102267713	22.9896	97.0979	-2.07846	0.000421168
XM_005902514.2	102267991	LOC102267991	13.5036	59.4302	-2.13785	0.00935825
XM_005902589.2	102275249	LOC102275249	1.52517	0.198105	2.94463	0.0212871
XM_005902591.2	102275826	RGR	0.343679	1.58697	-2.20714	0.025649
XM_005902600.2	102279297	SPP2	52.3403	16.7099	1.64722	0.000339603
XM_005902642.2	102267247	PAPD5	0.820882	2.28272	-1.47551	0.00902066
XM_005902656.2	102272599	LOC102272599	0.430581	5.88685	-3.77314	0.00816153
XM_005902660.2	102273534	EBAG9	0.000622725	0.700757	-10.1361	0.00300458
XM_005902765.2	102286979	POMT1	1.72e-05	0.256559	-13.8654	0.0228307
XM_005902864.2	102272482	FANK1	0.580781	0.094043	2.6266	0.0380337
XM_005902868.2	102274223	FAM221A	7.83e-05	1.4411	-14.1675	0.0175561
XM_005902872.1	102275061	STK31	5.82295	2.85748	1.02701	0.0233038
XM_005902981.2	102285188	NEFM	1.17357	0.392732	1.57929	0.0488936
XM_005902982.2	102285454	NEFL	0.110731	8.33e-06	13.6984	0.00396283
XM_005902990.1	102287455	PPP2R2A	2.90394	1.44001	1.01193	0.0495754
XM_005902993.2	102287928	BNIP3L	3.65159	1.26632	1.52788	0.00621871
XM_005902994.2	102287928	BNIP3L	0.235095	1.12175	-2.25444	0.0184092
XM_005902996.2	102264790	DPYSL2	0.16589	0.779849	-2.23297	0.0157098
XM_005903007.1	102267054	CHRNA2	0.137383	4.9e-20	61.2831	0.0175086
XM_005903012.2	102268362	APTX	1.1e-66	0.786437	-218.765	0.00255774
XM_005903051.2	102278916	CCL19	12.9259	96.2376	-2.89634	3.67e-11
XM_005903114.2	102276010	FIGF	14.2005	5.11607	1.47283	0.00766979
XM_005903119.2	102276770	ASB11	0.00255269	0.938448	-8.52211	0.00776296
XM_005903166.1	102267893	TENM3	2.43432	1.14425	1.08912	0.0178452
XM_005903209.2	102279863	C2CD3	0.170736	0.000107343	10.6353	0.00191855
XM_005903243.2	102265924	AMIGO2	1.04e-05	0.727513	-16.0992	0.0238251
XM_005903301.1	102284533	PREPL	0.0171967	2.11189	-6.94026	4.73e-07
XM_005903344.2	102274688	KIF18B	0.065773	0.417255	-2.66536	0.0260827
XM_005903440.1	102279390	GLS2	4.01e-20	0.232709	-62.3325	0.0345283
XM_005903502.2	102272600	TNNT3	0.885824	0.00124597	9.47361	0.0103008
XM_005903510.2	102275829	CTSD	0.158771	7.41e-06	14.3863	0.0441131
XM_005903556.2	102287638	RAD9A	1.55e-05	0.559666	-15.1439	0.000779882
XM_005903562.1	102264891	TMEM134	0.693266	1.4e-05	15.5956	0.0158881
XM_005903571.2	102267436	LOC102267436	0.774933	3.22099	-2.05536	0.0114679
XM_005903617.2	102285277	WBP11	0.208138	0.00147155	7.14406	0.0145749
XM_005903626.2	102287931	PLBD1	21.5578	9.15128	1.23616	0.00200298
XM_005903687.1	102284072	HOXA1	5.51e-06	0.256488	-15.5075	0.00852723
XM_005903751.1	102278359	EDIL3	3.04041	0.998264	1.60677	0.0214791
XM_005903819.2	102277989	PRSS35	0.221107	0.000158643	10.4447	0.00981678
XM_005903983.2	102284625	CAPN3	1.81e-11	0.170272	-33.1291	0.00832281
XM_005903984.2	102284625	CAPN3	1.23188	4.00009	-1.69917	0.00291682
XM_005903997.2	102287640	HAUS2	0.152364	3.86e-05	11.9472	0.0266084
XM_005904011.1	102269672	BAG5	8.3e-05	1.23022	-13.8554	1.06e-05
XM_005904041.1	102279763	TSPAN19	2.73874	0.432204	2.66373	0.0241938
XM_005904067.2	102287742	ALDOB	0.294104	0.00457584	6.00615	0.0172455
XM_005904102.2	102275254	SSTR2	0.929564	0.210329	2.14391	0.0272111
XM_005904124.2	102282488	SLC46A2	10.5366	22.0742	-1.06695	0.00713288
XM_005904138.1	102287174	LOC102287174	0.478046	3.71498	-2.95813	0.000461948
XM_005904140.2	102287641	LOC102287641	3.21262	12.2828	-1.93482	0.00027753
XM_005904172.1	102276014	DDX39B	0.167937	2.28e-06	16.1656	0.0441422
XM_005904250.1	102274602	CDK15	0.326595	0.000244724	10.3821	0.0263119
XM_005904436.2	102286037	LOC102286037	0.000173348	2.94833	-14.0539	0.00194206
XM_005904452.2	102269395	SNCA	11.0473	4.91978	1.16703	0.0391244
XM_005904457.1	102270220	MMRN1	21.5525	9.21811	1.22531	0.000266897
XM_005904534.1	102270421	TENM2	0.472795	0.000537008	9.78206	2.58e-05
XM_005904578.1	102286510	GFRA1	5.09314	10.5709	-1.05347	0.00223206
XM_005904593.1	102267813	FGFR4	0.00286131	0.71017	-7.95534	4.36e-06
XM_005904600.1	102269766	MXD3	0.442992	2.12677	-2.26331	0.0371579
XM_005904661.2	102287354	TMED2	2.18e-05	0.295654	-13.7275	0.0133752
XM_005904689.1	102270046	RSRC2	0.349253	2.72e-21	66.7991	0.00049587
XM_005904728.1	102283796	OAS2	0.555448	4.13e-05	13.7159	0.00314797
XM_005904755.1	102268463	ZDBF2	0.10977	0.378282	-1.78498	0.0489563
XM_005904853.2	102274797	WDR74	14.5709	6.52706	1.15858	0.0169394
XM_005904893.2	102264512	LOC102264512	0.622981	1.86e-05	15.035	0.0348198
XM_005904917.2	102270619	TSSK4	0.000642114	0.389854	-9.24589	0.0428717
XM_005904949.2	102279208	FUBP1	0.00251253	0.388925	-7.27421	0.048654
XM_005904951.2	102279208	FUBP1	0.142559	1.25e-12	36.7328	0.0337857
XM_005904965.1	102284917	SPEF2	1.76e-10	0.205276	-30.1156	0.0394741
XM_005905022.2	102285006	SPIB	0.255973	1.48645	-2.53781	0.0239763
XM_005905030.2	102287746	CPT1C	2.85721	6.1844	-1.11403	0.0296238
XM_005905040.2	102267336	MYBPC2	5.60173	13.3747	-1.25556	0.00027465
XM_005905046.2	102269298	DLGAP5	0.262944	1.75915	-2.74205	0.00103818
XM_005905118.1	102269857	NCAM1	1.08e-35	0.115293	-113.039	0.0321254
XM_005905206.1	102272783	LOC102272783	1.09e-05	0.426397	-15.2588	0.0178667
XM_005905214.2	102275072	PLA2G2F	2.16032	0.437412	2.30418	0.0302026
XM_005905255.2	102287936	FLNC	0.000213208	0.114077	-9.06353	0.0410578
XM_005905322.2	102288125	SCNN1G	0.428405	2.92514	-2.77146	0.000693729
XM_005905347.2	102270620	MAPT	0.291794	1.2e-05	14.5665	0.024029
XM_005905373.2	102280526	PYCR1	1.78396	0.467267	1.93276	0.0341205
XM_005905517.2	102281569	MBOAT2	9.34812	4.57701	1.03027	0.0337414
XM_005905522.2	102283145	ASTN1	3.34e-05	0.209319	-12.6118	0.00142333
XM_005905587.1	102281570	CDH11	32.704	16.0148	1.03006	0.000124964
XM_005905626.2	102274036	NEDD4	1.25259	0.00906624	7.11019	4.78e-05
XM_005905728.1	102286322	ARG2	3.53826	8.74398	-1.30525	0.0307287
XM_005905802.1	102284632	STRA6	6.45e-06	1.0667	-17.3349	0.000995505
XM_005905866.2	102277998	PMEL	1.54738	4.81955	-1.63907	0.0163373
XM_005905906.1	102288036	FMR1	0.168321	0.0102809	4.03318	0.00928398
XM_005905933.1	102275745	PDE1A	0.21345	0.0147833	3.85186	0.0232247
XM_005905957.1	102282497	RDM1	0.0788081	1.01086	-3.6811	0.0119302
XM_005906049.2	102287180	ZMYND15	8.32e-05	0.314237	-11.8826	0.0145504
XM_005906055.1	102264707	MINK1	0.0316253	0.735017	-4.53863	0.0183368
XM_005906147.1	102270329	LOC102270329	1.73e-06	74.0516	-25.3518	3.22e-05
XM_005906150.2	102271377	LOC102271377	26.2502	70.0943	-1.41697	0.0046991
XM_005906152.1	102271941	LOC102271941	98.5379	312.367	-1.66449	0.000849863
XM_005906257.2	102281463	TBC1D14	10.558	21.1954	-1.00541	0.0345671
XM_005906324.2	102281006	ATP2B1	0.190301	1.63e-05	13.5124	0.00147855
XM_005906335.2	102285763	LOC102285763	4.04895	1.43529	1.49621	0.00976499
XM_005906339.1	102286611	NTAN1	7.97676	3.08828	1.369	0.0423564
XM_005906362.2	102271096	CDC14A	0.0216155	1.75509	-6.34333	0.00142643
XM_005906501.2	102268291	ADGRF1	1.5431	4.88695	-1.6631	0.00171006
XM_005906509.2	102270143	PALMD	108.39	52.6565	1.04155	0.00035941
XM_005906523.2	102274519	GPC3	50.8729	23.2999	1.12657	0.00866308
XM_005906599.1	102280253	CRABP1	6.47459	1.57055	2.04352	0.00378633
XM_005906634.2	102264994	RBM26	0.000599688	0.690066	-10.1683	0.00124369
XM_005906719.2	102266401	DCTN1	0.000508421	0.40307	-9.63079	0.00456356
XM_005906746.2	102274127	SEMA4F	0.179632	1.02767	-2.51626	0.0292518
XM_005906778.1	102285954	MDGA1	0.375521	2.69104	-2.8412	0.000718176
XM_005906797.1	102268481	DEPDC1	0.0490789	0.38494	-2.97146	0.0359232
XM_005906841.1	102284090	TXNL4A	0.655503	2.25e-05	14.8303	0.026745
XM_005906878.2	102272794	TRIM6	0.373339	2.2e-06	17.3749	0.00914108
XM_005906917.2	102265758	SLC1A3	1.34418	3.5696	-1.40904	0.0154281
XM_005907022.2	102278102	ECI2	19.2107	9.55157	1.0081	0.0159914
XM_005907053.1	102287946	KIF15	0.309022	0.994609	-1.68642	0.0355327
XM_005907085.2	102272042	OXTR	27.4198	13.4217	1.03065	0.00189376
XM_005907120.2	102282509	APBB1	0.160129	1.44e-19	59.9447	0.0337756
XM_005907140.2	102265651	LOC102265651	0.250751	4.16e-05	12.5575	0.0283241
XM_005907145.1	102266515	POSTN	9.18051	18.6927	-1.02583	0.0044211
XM_005907211.2	102287371	FOXM1	0.000132008	0.162173	-10.2627	0.0459661
XM_005907248.2	102275758	SLC46A1	0.283257	6.64e-06	15.3815	0.00287779
XM_005907292.2	102265476	NPNT	0.397959	0.00187563	7.7291	0.00104205
XM_005907294.2	102266801	ENPP3	3.93022	7.87591	-1.00284	0.0139083
XM_005907360.1	102265652	RARRES1	125.619	43.9455	1.51527	1.64e-07
XM_005907418.2	102286236	ERG	0.23093	0.000160611	10.4897	0.012361
XM_005907439.1	102269966	LMO3	0.310943	4.65e-05	12.7065	7.47e-05
XM_005907489.2	102283349	ENO2	1.02552	0.00047671	11.071	1.44e-06
XM_005907523.2	102270908	TTN	0.788718	2.35126	-1.57585	0.000761192
XM_005907578.2	102287480	STEFIN-C	42.4051	133.443	-1.65391	0.000192316
XM_005907581.2	102288047	RRP1	0.315061	2.93e-05	13.3942	0.016065
XM_005907712.2	102280626	MBD1	0.0417913	1.93197	-5.53073	1.03e-06
XM_005907732.2	102287862	PI16	58.312	17.503	1.73619	3.33e-05
XM_005907847.2	102279320	CEP63	2.47e-05	0.521221	-14.3638	0.0183221
XM_005907867.2	102284648	PDLIM5	0.0980437	9.35e-09	23.322	0.0195596
XM_005907941.2	102285393	MIF4GD	6.04587	13.2885	-1.13616	0.0241277
XM_005907949.2	102287290	RECQL5	5.83e-05	0.344357	-12.5273	0.00793164
XM_005907999.2	102277828	FOXJ1	1.35644	0.0980506	3.79015	0.00172263
XM_005908026.1	102287102	IRF4	3.97105	1.55783	1.34998	0.0482136
XM_005908136.2	102278110	LRRC24	1.08461	6.69125	-2.6251	0.0176691
XM_005908241.1	102287766	WDR87	0.31319	0.00111849	8.12934	2.02e-07
XM_005908277.1	102275567	RYR1	0.987974	2.53729	-1.36074	0.00581967
XM_005908295.2	102281208	AIFM1	0.678551	5.13e-05	13.691	0.00803635
XM_005908318.2	102266058	CD163	7.00754	3.17278	1.14316	0.0400898
XM_005908325.2	102268586	CLINT1	0.363614	0.000128963	11.4612	0.00163218
XM_005908329.2	102269972	CYFIP2	0.0707343	2.67e-08	21.3372	0.0195464
XM_005908360.1	102279036	ABCC11	0.549708	1.67688	-1.60904	0.0207823
XM_005908377.2	102284940	CGGBP1	0.000757395	1.46712	-10.9197	0.0349729
XM_005908456.2	102265375	SLC25A25	0.000627129	0.528961	-9.72018	0.00493103
XM_005908529.2	102286061	OSBP2	6.65e-05	0.410341	-12.5901	0.00553846
XM_005908683.2	102284658	SLC11A2	20.8797	41.7662	-1.00023	0.0254891
XM_005908733.2	102275281	IL18BP	20.2221	60.106	-1.57158	0.000243795
XM_005908783.2	102266342	PPP2R4	1.25e-05	0.372579	-14.8664	0.00123249
XM_005908821.2	102282796	KRIT1	0.138077	7.18e-06	14.2316	0.0315205
XM_005908980.1	102269796	POU2F2	2.98e-05	0.284351	-13.2213	0.0352323
XM_005909009.2	102279240	UHRF1	0.823452	2.29067	-1.47601	0.0106305
XM_005909122.2	102268669	S1PR3	0.651432	0.000449971	10.4996	0.000300024
XM_005909166.1	102286442	MAT1A	0.44773	0.0917023	2.2876	0.0274202
XM_005909169.2	102287014	FOXO3	4.5955	2.07107	1.14985	0.00958405
XM_005909193.2	102270354	ARHGAP30	1.16e-09	0.170163	-27.1331	0.0273592
XM_005909206.2	102273858	ADAMTS4	0.870962	2.38722	-1.45465	0.0269461
XM_005909247.2	102265386	LOC102265386	0.00118829	0.165609	-7.12275	0.0353652
XM_005909287.2	102279041	SULF2	27.0136	55.2257	-1.03165	0.000873884
XM_005909297.2	102282332	SORBS2	0.165132	4.53e-06	15.1526	0.00104241
XM_005909386.2	102283557	MBP	0.428553	3.35e-05	13.6426	0.0231963
XM_005909440.1	102276619	XRCC6	1.23793	0.159673	2.95474	0.00919216
XM_005909503.2	102275287	THPO	0.000996751	0.237177	-7.89452	0.0173926
XM_005909504.2	102275287	THPO	0.156569	8.79e-06	14.121	0.0248149
XM_005909570.2	102271967	S100A12	0.00410037	7.83402	-10.8998	0.012742
XM_005909598.2	102280180	FN1	15.3082	4.90705	1.64138	0.0101991
XM_005909795.2	102271776	BCL2L2	0.0375053	4.79199	-6.99739	1.11e-08
XM_005909798.2	102272528	EFS	0.00623961	0.859794	-7.10639	0.00405843
XM_005909846.2	102287496	INPP4A	0.529989	0.00045294	10.1924	9.52e-05
XM_005909880.2	102276897	LOC102276897	6.21264	12.5795	-1.0178	0.00779675
XM_005909957.2	102284762	IKZF1	0.251873	0.00232143	6.76154	0.019581
XM_005909960.2	102284762	IKZF1	8.37e-05	0.335167	-11.9681	0.0342841
XM_005910035.2	102283564	TPM3	6.51115	15.8189	-1.28067	0.0283815
XM_005910086.2	102278770	DCN	742.753	317.977	1.22396	0.000195563
XM_005910087.2	102278770	DCN	338.816	134.983	1.32772	3.6e-05
XM_005910090.2	102279626	LUM	264.56	98.2094	1.42966	6.92e-06
XM_005910158.2	102279335	LOC102279335	4.59822	10.2261	-1.15311	0.0395139
XM_005910206.1	102276058	LOC102276058	104.734	379.284	-1.85655	0.000750665
XM_005910207.1	102276344	LOC102276344	45.8413	283.194	-2.62707	1.54e-05
XM_005910260.2	102278687	CATSPERB	0.331081	2.22732	-2.75005	0.000250265
XM_005910311.2	102270364	LOC102270364	26.6626	8.44309	1.65897	0.000360792
XM_005910358.1	102267384	IRAK3	1.25389	0.238519	2.39423	0.0127537
XM_005910473.2	102281684	ZFP37	0.298603	5.49e-05	12.4088	0.00602142
XM_005910542.1	102282059	COLQ	0.270869	3.64e-06	16.1839	0.0393236
XM_005910632.2	102267388	GPM6A	28.0056	11.528	1.28057	0.000120592
XM_005910637.1	102268680	DESI2	0.602811	7.43e-05	12.9861	0.0437036
XM_005910657.2	102275302	LOC102275302	140.862	31.5713	2.1576	0.0114552
XM_005910679.1	102284393	LOC102284393	3.8496	7.83281	-1.02482	0.0149176
XM_005910695.2	102268599	CLSTN3	1.19184	2.66356	-1.16017	0.0453336
XM_005910697.2	102269344	PEX5	0.24297	3.47e-05	12.7734	0.000298541
XM_005910750.2	102267487	ETV5	6.82125	15.2019	-1.15614	0.00733208
XM_005910752.1	102267763	DGKG	0.068494	0.57317	-3.06491	0.0333844
XM_005910755.2	102267763	DGKG	0.0448293	0.000205832	7.76683	0.0412549
XM_005910871.2	102282902	LOC102282902	2.53606	0.529471	2.25997	0.0419701
XM_005910881.2	102288173	LOC102288173	0.214285	1.60557	-2.90548	0.00936606
XM_005910919.2	102277665	DLD	0.15825	3.13e-05	12.3044	0.0339849
XM_005910930.2	102281124	LOC102281124	1.21735	0.112176	3.43991	0.0201754
XM_005910982.2	102279719	LOC102279719	0.0223418	5.72	-8.00013	1.1e-07
XM_005911069.1	102286637	FCER1A	9.27314	2.9178	1.66818	0.0220167
XM_005911413.2	102268048	MOG	0.00141734	0.453042	-8.32032	0.0440049
XM_005911495.1	102273605	IL5RA	0.687575	0.11744	2.54959	0.0286167
XM_005911522.2	102287409	UBAP2L	0.332006	0.000841777	8.62356	0.00207921
XM_005911604.1	102283192	LOC102283192	137.162	39.0344	1.81306	0.00335049
XM_005911800.2	102286344	CENPE	0.535626	1.30534	-1.28513	0.0139534
XM_005911863.1	102285102	PKHD1	0.248645	0.0596371	2.05981	0.037168
XM_005911888.2	102270755	OASL	0.000114713	0.542551	-12.2075	0.0162895
XM_005911983.1	102283085	LONRF2	11.0499	3.6369	1.60325	0.00557549
XM_014476280.1	102284377	LOC102284377	0.0371136	0.189727	-2.35391	0.0247501
XM_014476369.1	102275192	STK36	0.00126555	0.469272	-8.53452	0.00252256
XM_014476416.1	102267562	NIFK	0.263825	1.68e-05	13.9376	0.0284945
XM_014476476.1	102283273	ADGRG7	0.165714	1.78e-06	16.5103	0.0100632
XM_014476485.1	102281395	HINT3	0.729969	6.1014	-3.06323	0.000170052
XM_014476492.1	102269609	DMBT1	0.757911	7.00084	-3.20743	0.000623483
XM_014476493.1	102268218	TACC2	8.3e-08	0.157892	-20.8596	0.0309734
XM_014476509.1	102283742	WISP3	3.95e-06	0.479814	-16.8899	0.0108928
XM_014476542.1	102275491	NME1	1.04e-07	0.628683	-22.5236	0.00603262
XM_014476551.1	102268032	HSPA4	0.00233873	3.05589	-10.3517	1.28e-14
XM_014476596.1	102269980	KCTD20	8.92e-07	0.209424	-17.841	0.0454593
XM_014476608.1	102274613	HSD3B7	3.13e-05	1.46611	-15.5171	9.93e-06
XM_014476653.1	102278302	NUMBL	0.244642	1.26e-05	14.2393	0.000600349
XM_014476663.1	106700606	LOC106700606	2.84366	8.01635	-1.4952	0.00352288
XM_014476677.1	102280647	FBN3	0.174542	0.668202	-1.93671	0.0064225
XM_014476680.1	102275960	CCL25	0.383115	0.00122145	8.29304	0.00586255
XM_014476685.1	102274542	ANGPTL4	0.670924	2.48639	-1.88983	0.0339048
XM_014476696.1	102286348	ACP5	1.82184	0.00036699	12.2774	0.000248559
XM_014476755.1	102281782	MITF	2.59149	0.402742	2.68585	0.0126179
XM_014476956.1	102278310	BUB1	0.517432	1.95339	-1.91654	0.00493928
XM_014476968.1	102268232	C4BPA	12.2767	65.708	-2.42015	5.25e-06
XM_014476998.1	102287081	RHOC	0.00274046	4.08215	-10.5407	7.72e-08
XM_014477031.1	102269429	CHI3L1	370.395	905.525	-1.28969	0.00261478
XM_014477036.1	102266605	AP4B1	0.00853685	0.346331	-5.3423	0.0272879
XM_014477125.1	102285798	LOC102285798	170.461	375.102	-1.13784	0.00219911
XM_014477127.1	102278875	LOC102278875	26.3073	75.0479	-1.51235	0.000209775
XM_014477128.1	102285507	LOC102285507	82.171	169.59	-1.04535	0.0496049
XM_014477155.1	102265978	ZNHIT3	0.625461	1.62e-06	18.5562	0.0269275
XM_014477191.1	102284547	FGL1	11.8145	4.28234	1.46409	0.0358005
XM_014477194.1	102287978	ORC6	4.08588	0.132182	4.95005	6.62e-05
XM_014477217.1	102269719	EMC7	7.36e-06	0.426419	-15.822	0.0106038
XM_014477237.1	102284921	CTSB	2.29e-05	0.970526	-15.3729	0.00166578
XM_014477273.1	102279727	TNFRSF25	0.309126	0.0106511	4.85912	0.0114655
XM_014477286.1	102288078	PARK7	0.0164792	0.805719	-5.61156	0.00199348
XM_014477460.1	102288035	LOC102288035	12.8686	30.8367	-1.26079	6.13e-05
XM_014477534.1	102270091	MYOM1	0.613138	1.8639	-1.60404	0.00421271
XM_014477563.1	102287228	CDKL4	0.305813	2.17e-06	17.1036	0.0113935
XM_014477566.1	102269445	C4A	22.4906	63.9038	-1.50658	0.00420838
XM_014477567.1	102269725	LOC102269725	75.9131	200.958	-1.40447	0.00270874
XM_014477586.1	102264663	LOC102264663	3.94186	10.7649	-1.44939	0.0138573
XM_014477591.1	102270003	LETM2	0.622849	0.0029239	7.73484	8.54e-05
XM_014477592.1	102270003	LETM2	0.23083	0.000357683	9.33393	0.029196
XM_014477613.1	102276737	MRPL55	0.147328	2.0714	-3.8135	0.0303458
XM_014477674.1	102276551	EFEMP2	0.000220072	1.28985	-12.5169	0.00241293
XM_014477726.1	102271702	TMEM53	0.000346786	1.35016	-11.9268	0.0192033
XM_014477749.1	102271297	RIMS1	0.417708	0.114937	1.86165	0.0471957
XM_014477763.1	102278050	VCPKMT	0.00152702	1.27262	-9.70287	1.32e-05
XM_014477779.1	102264752	ADAT1	4.35256	9.29557	-1.09468	0.022722
XM_014477828.1	102280532	IL6ST	0.164782	7.1e-05	11.1799	0.00641296
XM_014477831.1	102276261	ATXN2L	0.130514	2.65e-10	28.8781	0.0160696
XM_014477840.1	102272947	CORO1A	1.27895	18.242	-3.83423	0.00023653
XM_014477856.1	102267500	TRIM9	5.02e-05	0.106877	-11.0566	0.0399754
XM_014477909.1	102266171	DNTTIP2	1.11325	3.64631	-1.71166	0.048793
XM_014477926.1	102266742	FMNL2	2.86409	7.23402	-1.33672	0.000977097
XM_014478119.1	102286657	EMP3	0.769734	4.69e-05	14.0021	0.00616558
XM_014478164.1	102284978	PPFIA4	0.679453	0.000570511	10.2179	4.94e-05
XM_014478187.1	102272089	MORF4L2	0.181656	1.75e-08	23.309	0.0337995
XM_014478219.1	102271526	CAD	0.000153951	0.351629	-11.1574	0.0141093
XM_014478262.1	102265891	PAQR7	0.223248	8.37e-12	34.634	0.0341097
XM_014478374.1	102265422	COL25A1	0.92581	0.19961	2.21353	0.0267326
XM_014478406.1	102280971	TRPM1	2.58414	0.408034	2.66292	4.59e-05
XM_014478410.1	102284145	CDPF1	1.45604	8.07579	-2.47155	0.00152624
XM_014478419.1	102273618	PRPF40B	0.477594	0.000161361	11.5313	0.00168755
XM_014478424.1	102280535	LRP2	5.51742	1.09777	2.32942	3.65e-05
XM_014478427.1	102280208	SWAP70	0.000191112	0.38845	-10.9891	0.00861488
XM_014478433.1	102266374	TREML2	0.244373	1.41231	-2.5309	0.04101
XM_014478443.1	102268001	LOC102268001	1.24064	3.13881	-1.33913	0.0162511
XM_014478473.1	102275897	CDH16	0.0787074	1.16812	-3.89155	0.0414487
XM_014478500.1	102267415	SSR3	0.000213795	0.75052	-11.7774	0.000474153
XM_014478531.1	102274417	DHRS9	0.00151508	0.741714	-8.93533	0.00987408
XM_014478570.1	102272001	TMEM14A	0.229269	2.34765	-3.3561	0.0135104
XM_014478623.1	102264960	CSN3	2.5759	11.5207	-2.16108	0.0257477
XM_014478637.1	102285533	THY1	1.87036	15.4698	-3.04807	0.0166228
XM_014478647.1	106700897	LOC106700897	8.61671	18.8646	-1.13047	0.0391282
XM_014478684.1	102268545	ZNF283	7.08473	3.09819	1.19329	0.0183613
XM_014478758.1	102270688	UBE2C	3.7e-07	0.460108	-20.245	0.0367057
XM_014478777.1	102272862	DCUN1D4	1.61104	0.00391636	8.68426	0.000620119
XM_014478825.1	102281262	WDR53	0.299734	0.000138271	11.082	0.0385258
XM_014478853.1	102287434	CELF2	4.79511	12.7768	-1.41389	0.00105098
XM_014478870.1	102278336	MRVI1	0.138966	0.000140082	9.95424	0.027853
XM_014478879.1	102276087	TOP2A	1.42552	5.43457	-1.93068	0.00024834
XM_014478892.1	102267697	PGAP3	0.943523	0.000476466	10.9515	0.00068692
XM_014478902.1	102268710	PBRM1	0.00020171	0.208074	-10.0106	0.00311309
XM_014478926.1	102277889	SNX3	7.48391	1.14275	2.71128	0.0364873
XM_014478969.1	102268892	KXD1	5.07e-06	0.422483	-16.3452	0.0304445
XM_014478982.1	102275465	TEX2	9.75e-06	0.263426	-14.7217	0.000126523
XM_014478996.1	102286579	CDC20	0.785496	2.98654	-1.9268	0.013014
XM_014479004.1	102265330	MBNL1	11.7036	4.56182	1.35927	0.00205178
XM_014479005.1	102265330	MBNL1	0.856363	0.264882	1.69287	0.0211788
XM_014479043.1	102269918	MFAP5	24.1714	10.1917	1.24591	0.0185213
XM_014479044.1	102270397	LOC102270397	0.0386667	0.565386	-3.87007	0.0277553
XM_014479069.1	102281632	CR2	5.16252	2.3788	1.11784	0.00986079
XM_014479104.1	102279181	UBQLN4	0.281312	1.87e-05	13.8805	0.00413789
XM_014479111.1	102285260	IQGAP3	0.236188	0.728296	-1.62459	0.0459861
XM_014479151.1	102287154	LAMA3	0.0617536	1.65e-05	11.8693	0.0350024
XM_014479159.1	102265612	LOC102265612	0.000679462	0.183372	-8.07616	0.04957
XM_014479191.1	102269275	AMBRA1	0.62297	0.109448	2.50892	0.0314709
XM_014479220.1	102282470	AASDH	0.211199	1.5e-05	13.783	0.000359828
XM_014479226.1	102265150	KIAA1033	0.115107	6.39e-05	10.8138	0.0065379
XM_014479236.1	102274015	SYNCRIP	0.246444	3.02e-12	36.2481	0.00404792
XM_014479249.1	102272961	MKI67	0.605728	3.61891	-2.57881	3.59e-07
XM_014479305.1	102280979	PLSCR1	6.29e-05	0.587425	-13.1881	0.0405796
XM_014479308.1	102281821	RGN	0.000254365	1.90254	-12.8687	2.8e-06
XM_014479343.1	102264401	CBY1	4.26594	1.60558	1.40977	0.0245577
XM_014479424.1	102281072	VIMP	0.38391	1.7e-05	14.4665	0.0214866
XM_014479485.1	102276600	MYLK2	0.11913	3.28e-05	11.8246	0.0299875
XM_014479534.1	102270607	VEGFA	2.41517	0.0745717	5.01735	0.0317189
XM_014479596.1	102275999	CTNNA1	0.133697	5.77e-05	11.1791	0.0156338
XM_014479599.1	102281439	CKAP2	1.53813	3.14194	-1.03048	0.0473053
XM_014479644.1	102280223	FOSB	10.621	1.71717	2.62881	0.000659385
XM_014479769.1	102271939	PRSS22	10.4303	22.4499	-1.10593	0.00600319
XM_014479777.1	102279469	PIGO	0.250688	2.89714	-3.53066	0.00603856
XM_014479789.1	102279693	DNAJB1	9.22081	3.43355	1.42519	0.0164879
XM_014479792.1	102271546	TAF1	0.311322	0.000325318	9.90234	0.000772522
XM_014479801.1	102265060	GJB1	9.51e-13	0.335602	-38.3598	0.0496024
XM_014479854.1	102279470	C5AR2	8.44568	3.78177	1.15915	0.00257814
XM_014479879.1	102285549	ARMCX1	2.17516	0.689518	1.65746	0.0243432
XM_014479881.1	102285549	ARMCX1	6.47e-05	0.289384	-12.1268	0.0262904
XM_014479925.1	102284903	BEST3	0.576891	0.000650744	9.79199	0.00289485
XM_014479933.1	102265912	AVPI1	4.62026	13.3075	-1.52619	0.00661898
XM_014479938.1	102270609	HPSE2	17.9968	7.41116	1.27997	8.07e-05
XM_014479941.1	102274022	ADGRG6	1.8388	4.26591	-1.21409	0.0136164
XM_014479942.1	102274022	ADGRG6	4.96447	2.41503	1.0396	0.0179028
XM_014479961.1	102277418	LOC102277418	4.37494	11.7901	-1.43024	0.0133988
XM_014480024.1	102273346	CROCC2	0.723365	2.92111	-2.01372	0.000179461
XM_014480080.1	102264883	PPT2	0.409643	0.000146746	11.4468	0.0114857
XM_014480104.1	102276662	CTDSP2	5.72e-05	0.533028	-13.1866	1.73e-06
XM_014480130.1	102279861	TRHDE	0.0916953	0.426961	-2.21918	0.0237113
XM_014480150.1	102280510	NINJ1	3.03374	0.483738	2.6488	0.0250095
XM_014480228.1	102279950	CSN2	0.00526315	4.19715	-9.63927	0.0011003
XM_014480268.1	102284812	ROBO2	1.75744	0.238843	2.87934	0.00360649
XM_014480277.1	106701159	LOC106701159	44.169	282.593	-2.67762	0.00697554
XM_014480292.1	102284907	PNN	1.98328	3.78e-05	15.6791	1.56e-05
XM_014480309.1	102277039	LSS	6.94e-15	0.321985	-45.3991	0.00226445
XM_014480366.1	102282016	SLC31A2	3.42161	9.71399	-1.50539	0.0240704
XM_014480370.1	102279757	RNF183	2.04157	8.38157	-2.03754	0.0116097
XM_014480408.1	102286898	HCFC1R1	0.000621289	1.23356	-10.9553	0.0301975
XM_014480457.1	102265732	LAMC3	3.27349	0.895159	1.87061	9.37e-06
XM_014480471.1	102278914	FILIP1	0.0823357	3.15e-06	14.6718	0.0494321
XM_014480477.1	102285092	SMOC2	56.244	26.4535	1.08824	2.79e-05
XM_014480523.1	102269014	RSPH10B	0.573091	0.0965152	2.56994	0.0324199
XM_014480592.1	102281735	EIF2S2	0.303138	3.52e-11	33.0056	0.038956
XM_014480651.1	102284826	LOC102284826	13.8685	37.3359	-1.42875	0.000290038
XM_014480672.1	102284826	LOC102284826	14.8307	36.2645	-1.28997	0.00243157
XM_014480679.1	102270415	RABL2B	0.00536145	1.2101	-7.81829	1.27e-05
XM_014480683.1	102269852	ARSA	3.99192	9.17239	-1.20021	0.0229614
XM_014480692.1	102274599	ZC3H10	1.86e-05	0.299011	-13.9724	0.0111329
XM_014480693.1	102276109	RNF41	1.99917	0.0596217	5.06742	0.000284419
XM_014480754.1	102274791	DIO1	0.0333847	0.357213	-3.41953	0.0492055
XM_014480829.1	102279302	KIAA0408	3.75633	1.45903	1.36431	0.0228804
XM_014480846.1	102277044	LY9	0.00144618	2.68059	-10.8561	1e-11
XM_014480886.1	102281453	MAPKBP1	0.0769833	2.39e-05	11.6545	0.0234297
XM_014480917.1	102265927	LOC102265927	3.32e-05	1.19091	-15.1313	0.00240525
XM_014480946.1	102286791	LOC102286791	29.6658	142.149	-2.26053	4.77e-11
XM_014480947.1	102285479	LOC102285479	0.723897	0.000262386	11.4299	0.00846171
XM_014480960.1	102281091	GPANK1	4.11288	9.55485	-1.21608	0.023499
XM_014480996.1	102264702	CARHSP1	6.46e-05	0.806376	-13.6087	0.037048
XM_014481000.1	106701262	LOC106701262	8.70936	51.8558	-2.57387	3.47e-06
XM_014481006.1	102277517	TRIM59	0.224972	9.95e-10	27.7526	0.00183446
XM_014481008.1	102284000	MEF2A	0.000103427	0.721583	-12.7683	2.45e-05
XM_014481022.1	102270220	MMRN1	71.6466	29.3693	1.28659	1.61e-05
XM_014481077.1	102267813	FGFR4	0.224051	3.35e-05	12.7085	0.00051782
XM_014481088.1	102267333	ZNF346	0.668975	0.0212147	4.97882	0.000505647
XM_014481094.1	102281093	TUBGCP3	0.166577	8.9e-05	10.8697	0.00978103
XM_014481122.1	102284539	TPCN1	0.00973675	0.809269	-6.37704	0.00195258
XM_014481124.1	102287463	RASAL1	16.2237	37.222	-1.19805	0.00143526
XM_014481168.1	102281742	TRIT1	0.505089	2.04e-05	14.5925	0.000137711
XM_014481175.1	102269483	IPO4	0.0746094	1.36e-08	22.386	0.0438644
XM_014481224.1	102274798	LOC102274798	0.105995	0.513932	-2.27758	0.0280511
XM_014481302.1	102278554	ZSCAN31	2.72e-05	0.612676	-14.4599	0.00790461
XM_014481370.1	102287937	TMPO	3.4932	1.59841	1.12791	0.0284318
XM_014481398.1	102272322	TCF12	0.0318411	0.69129	-4.44033	0.00435116
XM_014481402.1	102277238	RSL24D1	40.8532	13.0559	1.64575	0.0316601
XM_014481506.1	102277811	ITGA4	0.000171354	1.96032	-13.4818	0.022963
XM_014481509.1	102280438	LOC102280438	0.661759	8.72e-05	12.8896	0.00177563
XM_014481512.1	102266315	CORO2A	0.0656654	1.01e-05	12.6612	0.0384614
XM_014481519.1	102266602	TBC1D2	1.03503	4.05e-05	14.6429	9.38e-05
XM_014481532.1	102275552	NECAP2	0.73882	0.0831812	3.15089	0.0106079
XM_014481538.1	102287288	ATF3	2.30554	0.0905236	4.67067	0.000402777
XM_014481554.1	102282669	ASGR1	1.02e-05	0.595393	-15.8321	0.0208816
XM_014481587.1	106700510	LOC106700510	25.1607	168.475	-2.74329	4.74e-05
XM_014481601.1	102271572	AK2	0.435804	1.34e-05	14.9905	0.00165078
XM_014481608.1	102284084	ADGRB2	2.35e-05	0.215491	-13.1621	0.00927307
XM_014481623.1	102280052	FCAR	0.808533	0.00576533	7.13176	0.00639659
XM_014481630.1	102283525	LOC102283525	1.08905	0.00733825	7.21342	0.0033019
XM_014481666.1	102273482	CYFIP1	0.272396	9.55e-05	11.4782	0.00200005
XM_014481675.1	102277057	GALNT5	1.03046	2.82721	-1.45609	0.0476526
XM_014481694.1	102272613	CAPRIN2	0.441509	1.28656	-1.543	0.0281512
XM_014481695.1	102272613	CAPRIN2	4.06117	1.90715	1.09048	0.0208739
XM_014481696.1	102272613	CAPRIN2	0.0283904	0.925471	-5.02671	2.29e-05
XM_014481697.1	102272613	CAPRIN2	8.67e-08	0.451074	-22.3116	6.77e-05
XM_014481698.1	102272613	CAPRIN2	0.674884	0.126511	2.41538	0.0333693
XM_014481702.1	102274043	LOC102274043	0.000178602	0.80967	-12.1464	0.000510354
XM_014481745.1	102272414	HSDL2	0.386001	8.92e-06	15.4014	0.0109435
XM_014481758.1	102274616	ZNF32	0.629885	0.000118941	12.3706	0.00505626
XM_014481764.1	102281667	CALM1	0.187262	0.000106804	10.7759	0.00563855
XM_014481766.1	102281009	ACSBG1	2.89e-05	0.341113	-13.525	0.0010703
XM_014481915.1	102268381	KRT6A	0.474287	4.9e-05	13.2409	0.00190461
XM_014481923.1	102278102	ECI2	3.03596	15.5286	-2.3547	0.000423028
XM_014481949.1	102276318	SEC16B	0.000123605	0.275636	-11.1228	0.0121595
XM_014482109.1	102285677	CBS	1.48e-05	0.205577	-13.7663	0.0378255
XM_014482123.1	102273764	IL4R	1.04e-05	0.295555	-14.7884	0.00968766
XM_014482153.1	102279511	LOC102279511	13.4537	494.512	-5.19993	1.28e-06
XM_014482163.1	102287862	PI16	143.908	58.53	1.2979	0.00105811
XM_014482204.1	102268388	FHL1	4.82003	0.148688	5.01868	0.00855506
XM_014482209.1	102270911	LOC102270911	0.330092	0.0257302	3.68133	0.0175542
XM_014482260.1	102285966	SLC25A19	8.11e-05	0.896613	-13.433	0.00182426
XM_014482264.1	102280915	TMEM104	0.192439	2.06419	-3.4231	0.00889962
XM_014482269.1	102284371	HN1	0.00494992	0.858606	-7.43845	0.000736658
XM_014482270.1	102284371	HN1	1.4943	0.110965	3.75129	0.00796377
XM_014482322.1	102269788	HMCES	2.63e-05	0.592903	-14.4629	0.0340077
XM_014482377.1	102271666	FFAR3	0.164313	1.11e-05	13.8556	0.0497151
XM_014482378.1	102287766	WDR87	0.000386143	0.293064	-9.56786	4.63e-07
XM_014482391.1	102280359	UTP14A	1.09e-05	0.266625	-14.5826	0.0229757
XM_014482446.1	102266340	CIZ1	0.36292	7.33e-05	12.2736	0.00532985
XM_014482457.1	102277169	LOC102277169	1.95365	0.459497	2.08804	0.0117523
XM_014482484.1	102266808	TPD52L2	1.02796	3.17809	-1.62838	0.0290922
XM_014482572.1	102272057	HMCN2	4.87146	9.8393	-1.0142	0.00268365
XM_014482659.1	102266815	LIPE	0.0496007	0.545186	-3.45832	0.0191003
XM_014482688.1	102272059	SLC6A8	0.000205507	0.635438	-11.5943	0.000990218
XM_014482692.1	102272811	ABCD1	0.643649	2.41919	-1.91018	0.0198357
XM_014482815.1	102280554	RHOA	4.28e-06	0.175907	-15.3254	0.0411265
XM_014482862.1	102274341	CPTP	0.893404	0.000142865	12.6104	1.13e-05
XM_014482866.1	102275004	CHRD	4.91e-05	0.93759	-14.2224	3.43e-07
XM_014482870.1	102280462	DVL3	0.390046	2.7e-05	13.8169	6.34e-05
XM_014482883.1	102274639	S100A9	60.9432	324.437	-2.4124	0.00891345
XM_014482905.1	102270358	LOC102270358	0.443693	4.49397	-3.34036	0.00328993
XM_014482925.1	102267480	SGCE	0.18916	1.58e-05	13.5444	0.0351007
XM_014482951.1	102272247	SLC22A17	0.267983	1.64e-05	13.9996	0.00218174
XM_014482963.1	102281032	LOC102281032	0.724708	2.36731	-1.70778	0.00674879
XM_014483038.1	102271603	LOC102271603	0.0995782	2.01e-19	58.7808	0.0307645
XM_014483096.1	102276149	EIF3K	0.438896	3.4e-06	16.9796	0.0325279
XM_014483101.1	102279049	LOC102279049	20.9149	126.468	-2.59617	0.000759138
XM_014483197.1	102269064	GMIP	0.11673	4e-05	11.5121	0.0314865
XM_014483221.1	102265304	RELL2	0.00577226	1.37673	-7.89789	0.00124227
XM_014483244.1	102274451	LOC102274451	4.28437	0.94162	2.18587	0.0234868
XM_014483280.1	102284393	LOC102284393	0.208292	8.84e-05	11.2021	0.0148769
XM_014483281.1	102284393	LOC102284393	0.387171	7.81e-06	15.5978	0.000151224
XM_014483294.1	102268042	C1RL	4.08919	10.1457	-1.31098	0.00599267
XM_014483321.1	102271886	ADIPOQ	0.130749	0.000120161	10.0876	0.0333381
XM_014483357.1	102274933	MRPL4	1.49e-06	0.275912	-17.5005	0.0180172
XM_014483367.1	102283463	LOC102283463	2.87698	0.000188806	13.8954	1.6e-07
XM_014483384.1	102272441	ERN2	0.321711	0.000197743	10.6679	0.00429712
XM_014483403.1	102284957	CHD1L	0.000153003	0.944688	-12.5921	6.71e-06
XM_014483417.1	102265289	ERCC8	1.01446	0.000641753	10.6264	0.00122362
XM_014483470.1	102275307	MAP3K3	1.17898	3.06906	-1.38026	0.0229187
XM_014483502.1	102276066	PHF6	2.27695	0.730708	1.63974	0.0401251
XM_014483533.1	102280288	LOC102280288	28.4833	87.9171	-1.62603	0.00105129
XM_014483612.1	102277668	PTGER3	0.692068	3.46e-05	14.287	3.18e-05
XM_014483637.1	102273311	CNTN4	19.0393	7.84027	1.28001	3.65e-06
XM_014483649.1	102281521	LOC102281521	0.000577842	7.29897	-13.6247	1.75e-09
XM_014483651.1	102280949	LOC102280949	5.84273	16.3388	-1.48359	0.04398
XM_014483656.1	102287409	UBAP2L	7.62e-05	0.342367	-12.133	0.00768618
XM_014483661.1	102267854	LOC102267854	9.51665	50.3832	-2.40442	0.000438845
XM_014483698.1	106701720	LOC106701720	3.92489	10727.6	-11.4164	0.000146192
XM_014483744.1	102277735	CHCHD7	11.3831	4.78141	1.25139	0.0211223
XR_001351371.1	102272078	MEMO1	0.00138283	1.26013	-9.83173	0.00467258
XR_001351818.1	102277057	GALNT5	1.369	5.87551	-2.10159	0.00341589
